# Supplementary material for: Performance of InSilicoVA for assigning causes of death to verbal autopsies: multisite validation study using clinical diagnostic gold standards
Source: BMC Med. 2018 Apr 19;16:56. doi: 10.1186/s12916-018-1039-1 (PMC5907465; doi:10.1186/s12916-018-1039-1)
Supplement: Supplementary file 3 — Misclassification matrix for child deaths when InSilicoVA is trained using Tariff 2.0 symptoms without health care experience questions. (XLSX 7 kb) [file 12916_2018_1039_MOESM3_ESM.xlsx]

## Sheet: Sheet1
True Cause	Diarrhea/Dysentery (A09)	Sepsis (A41)	Hemorrhagic fever (A99)	Measles (B05)	AIDS (B24)	Malaria (B54)	Other Infectious Diseases (B99)	Other Cancers (C76)	Meningitis (G03)	Encephalitis (G04)	Other Cardiovascular Diseases (I99)	Pneumonia (J22)	Other Digestive Diseases (K92)	Other Defined Causes of Child Deaths (R101)	Road Traffic (V89)	Falls (W19)	Drowning (W74)	Fires (X09)	Bite of Venomous Animal (X27)	Poisonings (X49)	Violent Death (Y09)	All
Diarrhea/Dysentery (A09)	2932	267	47	446	199	1556	805	163	491	326	924	699	405	1048	130	777	137	246	197	305	3	12103
Sepsis (A41)	415	839	326	77	175	1529	1020	171	769	764	1244	919	609	1400	53	89	14	218	25	105	0	10761
Hemorrhagic fever (A99)	16	264	2951	297	82	989	1767	1324	121	1500	1559	143	805	138	0	36	0	0	40	164	0	12196
Measles (B05)	28	394	6	9066	0	0	1212	1	0	791	61	20	8	39	0	514	16	0	4	93	0	12253
AIDS (B24)	209	33	31	0	5764	1840	482	152	1356	431	989	441	5	771	0	0	0	149	0	0	0	12653
Malaria (B54)	654	257	308	6	385	5687	194	170	785	145	751	270	105	776	111	178	39	264	43	65	0	11193
Other Infectious Diseases (B99)	194	119	325	465	64	298	3791	619	318	3069	360	145	445	843	40	727	3	460	267	257	0	12809
Other Cancers (C76)	278	48	1391	67	455	525	3674	1917	262	603	353	104	567	1180	11	338	0	94	224	105	1	12197
Meningitis (G03)	396	511	36	132	340	2067	2138	194	2794	1439	376	764	37	741	0	116	0	0	6	173	0	12260
Encephalitis (G04)	147	217	274	876	62	501	2985	137	967	4119	98	373	247	255	0	198	0	23	0	129	0	11608
Other Cardiovascular Diseases (I99)	413	395	188	139	293	1367	760	500	293	142	2083	1458	399	1913	259	238	51	394	152	117	0	11554
Pneumonia (J22)	626	380	162	35	417	1520	704	335	765	544	1723	2668	434	1231	14	38	0	55	15	57	0	11723
Other Digestive Diseases (K92)	262	390	458	28	123	795	1002	595	545	1433	839	552	1644	1663	37	131	72	36	61	188	0	10854
Other Defined Causes of Child Deaths (R101)	308	241	152	8	266	889	1304	220	467	626	850	616	761	2274	225	1350	661	379	127	172	91	11987
Road Traffic (V89)	0	3	2	102	0	14	235	0	12	38	7	0	20	79	10814	336	182	78	122	41	1	12086
Falls (W19)	0	12	5	7	0	0	591	21	27	99	44	69	75	1349	498	6850	1023	611	191	246	166	11884
Drowning (W74)	9	2	8	0	0	110	20	0	5	0	30	0	46	171	255	466	11172	28	27	41	34	12424
Fires (X09)	112	338	0	0	47	264	188	163	47	10	46	17	66	1006	386	1079	430	6682	359	56	709	12005
Bite of Venomous Animal (X27)	10	0	168	0	2	0	391	20	0	153	75	0	56	105	121	323	22	300	11234	21	0	13001
Poisonings (X49)	278	40	14	1074	0	333	799	33	28	82	447	4	19	1023	377	711	208	555	327	4991	44	11387
Violent Death (Y09)	9	25	36	14	0	149	1	4	33	3	11	100	14	130	332	847	260	372	154	352	9508	12354
All	7296	4775	6888	12839	8674	20433	24063	6739	10085	16317	12870	9362	6767	18135	13663	15342	14290	10944	13575	7678	10557	251292
